# Supplementary material for: Selective and naked eye colorimetric detection of creatinine through aptamer-based target-induced passivation of gold nanoparticles
Source: Royal Society of Chemistry journal article supplement (doi:10.1039/d4ra06191h), 2024-01-01
Supplement: d4ra06191h1.pdf [file d4ra06191h1.pdf]

**Selective and naked eye colorimetric detection of creatinine by aptamer-based target induced passivation of gold nanoparticles**

Chiranjit Das<sup>a</sup>, Jeethu Raveendran<sup>b</sup>, Jagadeesh Bayry<sup>b</sup>, P Abdul Rasheed<sup>b,a\*</sup>

<sup>a</sup>Department of Chemistry, Indian Institute of Technology Palakkad, Palakkad, Kerala, India- 678623

<sup>b</sup>Department of Biological Sciences and Engineering, Indian Institute of Technology Palakkad, Palakkad, Kerala, India- 678623

\*[abdulrasheed@iitpkd.ac.in](mailto:abdulrasheed@iitpkd.ac.in) (PAR)

**Supplementary information**

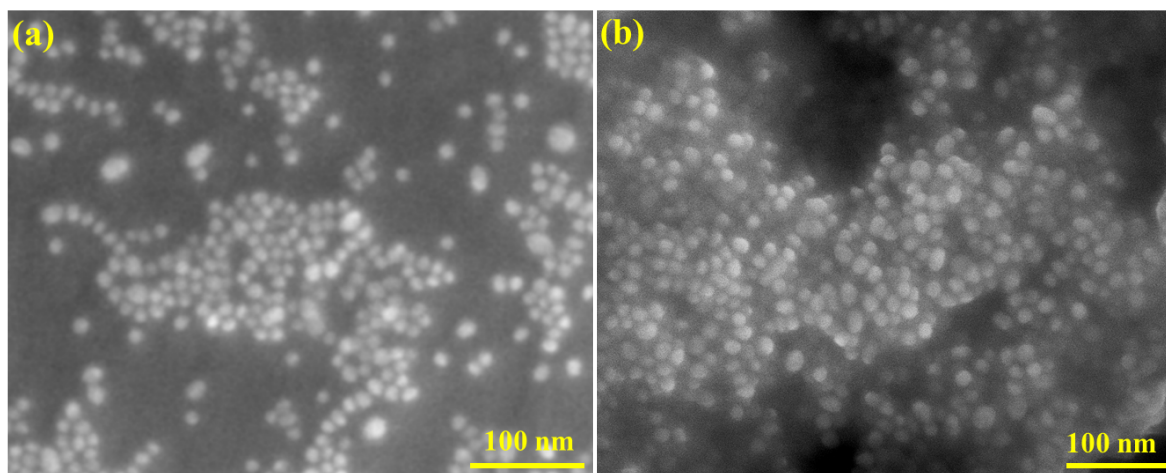

Fig. S1. SEM images of (a) AuNPs and (b) DNA-AuNPs

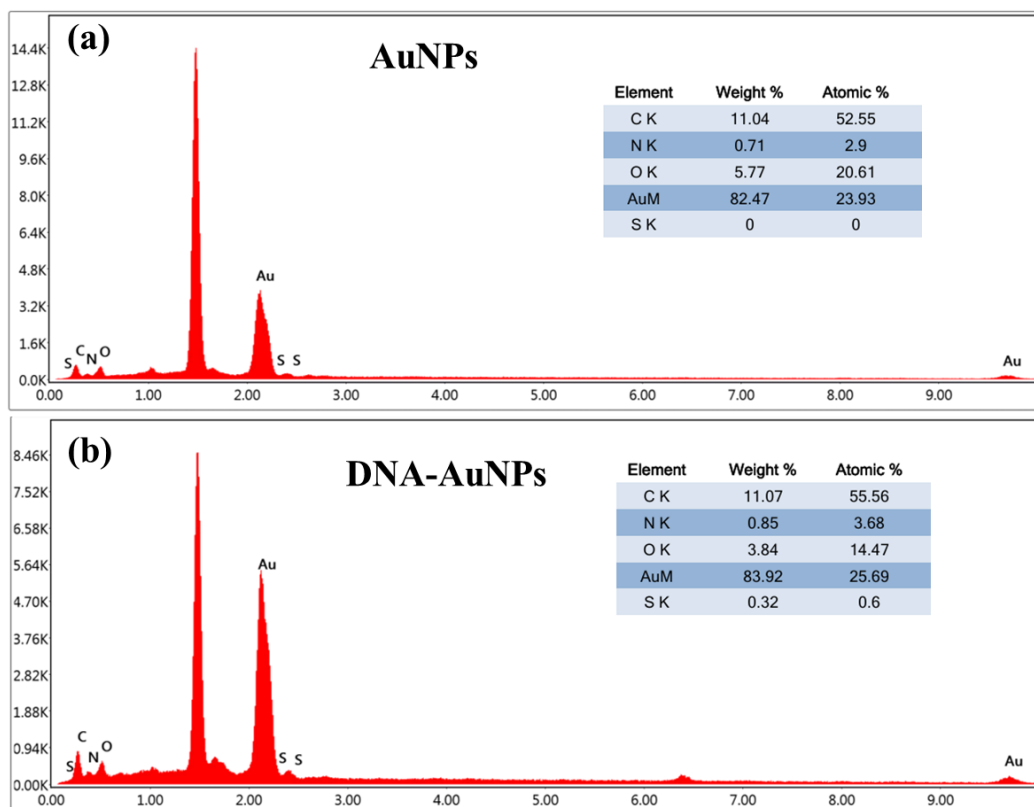

Fig. S2. EDS spectra of (a) AuNPs and (b) DNA-AuNPs

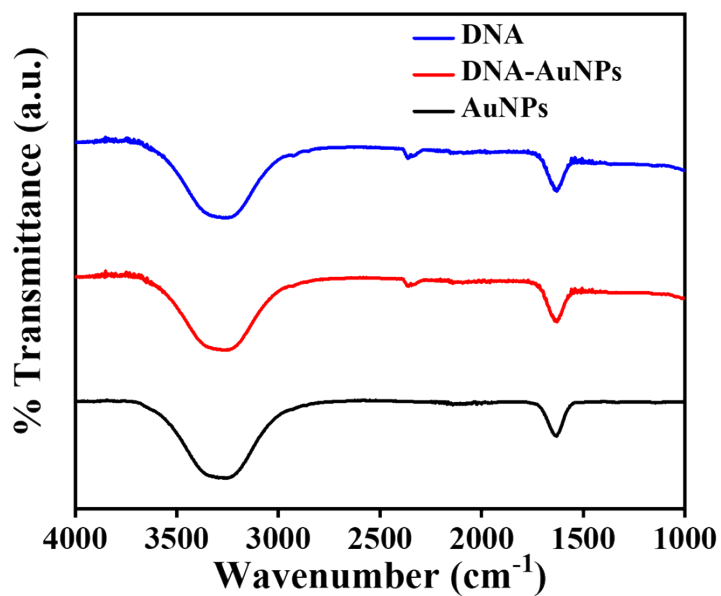

Fig. S3. FTIR spectra of DNA, AuNPs and DNA-AuNPs.

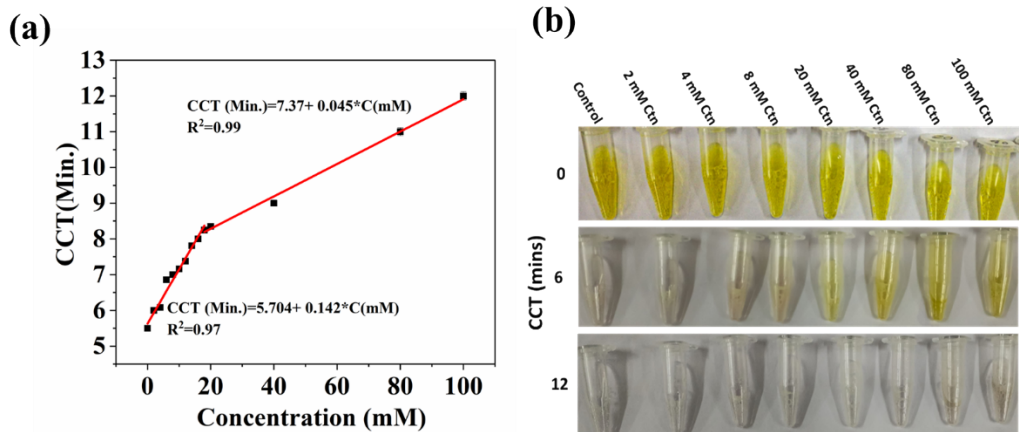

Fig. S4. (a) The CCT versus concentration of creatinine of the developed assay with varying concentrations from 0-100 mM (b) Photographs capturing the reaction mixtures at 0, 6, and 12 min.
